# Supplementary material
Source: PubMed Central journal article supplement (PMC10510539)
Supplement: ptc-2021-0074_supplement1.pdf [file ptc-2021-0074_supplement1.pdf]

**A**

Stroke Population Severity Based on (m)FMA-UE Scores

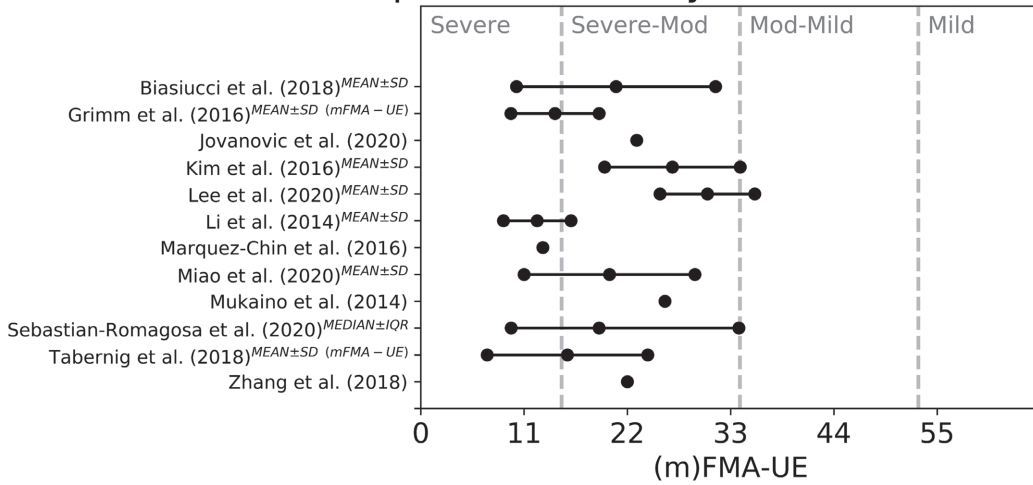

**B**

SCI Population Severity Based on AIS Grades

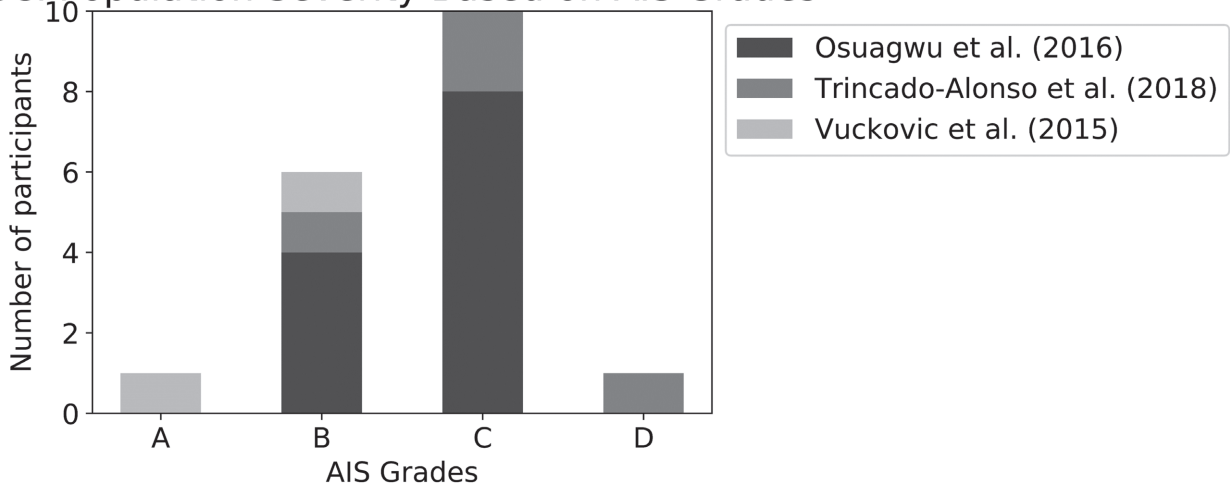

**Figure 1** The graphical representation of the distribution of severity among participants of BCI-ES interventional studies. (A) The severity of upper limb impairment in the stroke population in studies which used standard or modified Fugl-Meyer Assessment-Upper Extremity (FMA-UE or mFMA-UE) scores to assess arm and hand function at baseline. The vertical dashed lines are used to separate the severity clusters identified by Woytowicz et al. (B) The severity of injury and, by extension, upper limb impairments in the SCI population is represented with a histogram on AIS grades.

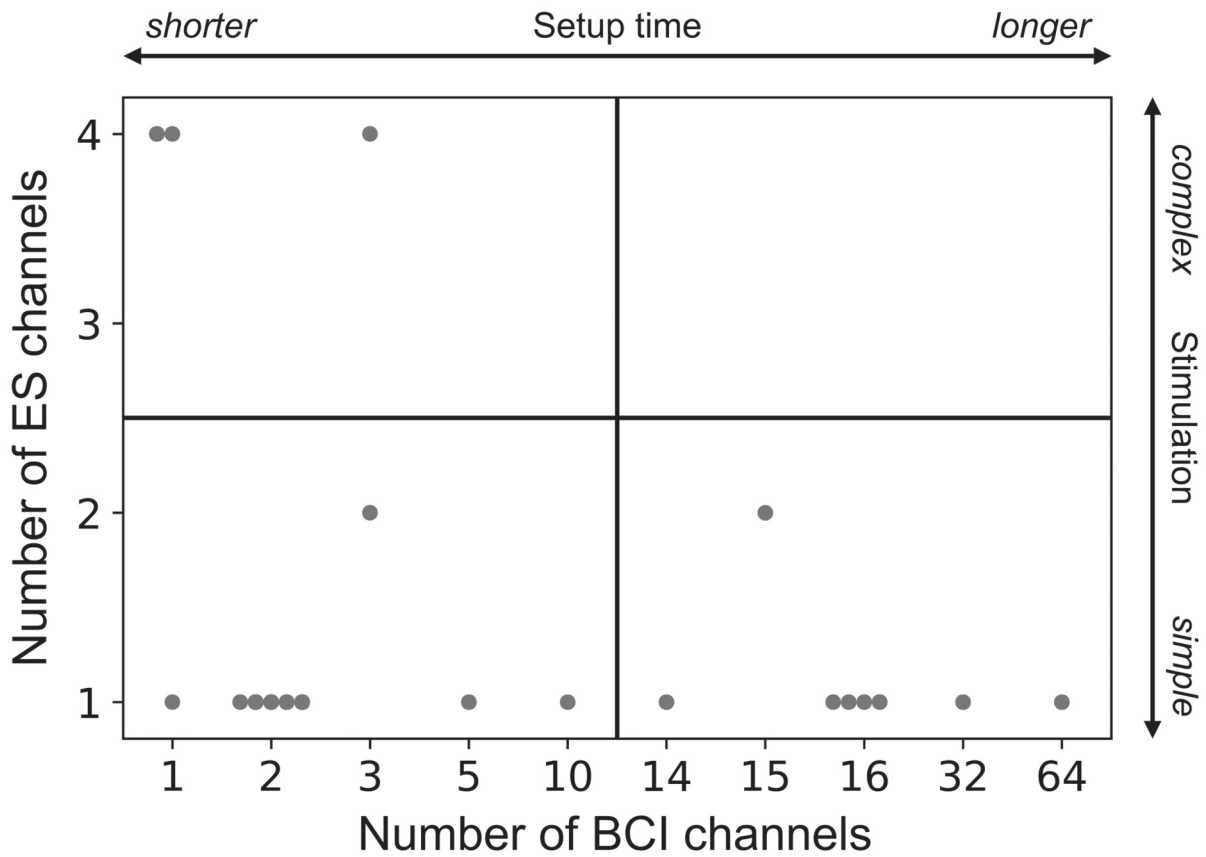

**Figure 2** The scatter plot, in which each dot represents a BCI-ES system described in the reviewed studies. The horizontal axis represents the number of BCI channels used in a BCI-ES system, with fewer channels indicating a shorter setup time. The vertical axis represents the number of ES channels used in a BCI-ES system, with more channels indicating more complex stimulation-assisted movements. The graph displays 20, rather than 23 systems, because the number of ES channels was inconclusive in three studies.
